# Supplementary material for: Plant Biostimulants Enhance Tomato Resilience to Salinity Stress: Insights from Two Greek Landraces
Source: MDPI journal article supplement (doi:10.3390/plants13101404), 2024-05-17
Supplement: s1 [file s1]

**Table S1:** The application dates of the biostimulant are listed alongside the respective product.

| <b>Application dates</b> | <b>Biostimulants</b> |           |
|--------------------------|----------------------|-----------|
| 19 April 2022            | Algastar             | Nitrostim |
| 27 April 2022            | Algastar             | -         |
| 29 April 2022            | -                    | Nitrostim |
| 17 May 2022              | Algastar             | Nitrostim |
| 27 May 2022              | Algastar             | Nitrostim |
| 15 June 2022             | Algastar             | Nitrostim |
| 1 July 2022              | Algastar             | Nitrostim |
